# Supplementary material for: Smart@home – supporting safety and mobility of elderly and care dependent people in their own homes through the use of technical assistance systems and conventional mobility supporting tools: a cross-sectional survey
Source: BMC Geriatr. 2021 Mar 24;21:205. doi: 10.1186/s12877-021-02118-9 (PMC7992959; doi:10.1186/s12877-021-02118-9)
Supplement: Supplementary file 1 — Additional file 1. Smart@Home_Questionnaire English version. Translation in English language form the original questionnaire in German language. [file 12877_2021_2118_MOESM1_ESM.pdf]

Coding: ☐ ☐**Personal data****Age in years:** 65-70 ☐ 71-75 ☐ 76-80 ☐ 81-85 ☐ 86-90 ☐ >90 ☐**Sex:** male ☐ female ☐**Living alone:** yes ☐ no ☐**Care degree:** yes ☐ no ☐if yes, which care degree: 1 ☐ 2 ☐ 3 ☐ 4 ☐ 5 ☐**Do you have any physical ailments or problems?**Chronic pain ☐ Mobility limitations ☐ Urinary incontinence ☐

Other ailments: \_\_\_\_\_

**Smart home solutions from GESOBAU were installed in my apartment:** yes ☐ no ☐**Smart home solutions from other providers were installed in my apartment:** yes ☐ no ☐

| Please indicate to which extent you agree or do not agree to the following statements.                                      | fully agree           | rather agree          | partly agree          | rather not agree      | not agree             |
|-----------------------------------------------------------------------------------------------------------------------------|-----------------------|-----------------------|-----------------------|-----------------------|-----------------------|
| I would like to live in my apartment even if the need for care arises.                                                      | <input type="radio"/> |
| Even with increasing need for care (up to being bedridden), I want to live in my apartment.                                 | <input type="radio"/> |
| Smart home solutions (e.g. orientation light on the ground, fall detection sensor) enable me to live longer in my own home. | <input type="radio"/> |
| I have a person with whom I am in regular contact to report that I am doing well.                                           | <input type="radio"/> |
| I know whom I can inform immediately in the case of an emergency.                                                           | <input type="radio"/> |
| I leave my apartment regularly to maintain social contacts.                                                                 | <input type="radio"/> |
| I feel safe in my apartment.                                                                                                | <input type="radio"/> |
| The installed smart home solutions make me feel safer in my home.                                                           | <input type="radio"/> |
| Smart home solutions in my home lead to more security.                                                                      | <input type="radio"/> |
| I can move independently in my apartment.                                                                                   | <input type="radio"/> |
| I can orientate myself well in my apartment even in the dark.                                                               | <input type="radio"/> |
| I am afraid of forgetting to switch off electronic devices and causing fire damage.                                         | <input type="radio"/> |
| I am afraid of forgetting to switch off electronic devices and causing water damage.                                        | <input type="radio"/> |
| I feel comfortable in my apartment.                                                                                         | <input type="radio"/> |

| Please tick whether the respective smart home solution is available to you in your home. |                             |                              | Please rate the smart home solutions installed in your home using a grading scale from 1 (very good) to 6 (insufficient). |          |          |          |          |          |
|------------------------------------------------------------------------------------------|-----------------------------|------------------------------|---------------------------------------------------------------------------------------------------------------------------|----------|----------|----------|----------|----------|
| <b>INSTALLED SMART HOME SOLUTIONS</b>                                                    |                             |                              |                                                                                                                           |          |          |          |          |          |
|                                                                                          |                             |                              | <b>1</b>                                                                                                                  | <b>2</b> | <b>3</b> | <b>4</b> | <b>5</b> | <b>6</b> |
| Tablet                                                                                   | no <input type="checkbox"/> | yes <input type="checkbox"/> |                                                                                                                           |          |          |          |          |          |
| Stove safety                                                                             | no <input type="checkbox"/> | yes <input type="checkbox"/> |                                                                                                                           |          |          |          |          |          |
| Orientation light                                                                        | no <input type="checkbox"/> | yes <input type="checkbox"/> |                                                                                                                           |          |          |          |          |          |
| Lighting control                                                                         | no <input type="checkbox"/> | yes <input type="checkbox"/> |                                                                                                                           |          |          |          |          |          |
| LED strip (corridor)                                                                     | no <input type="checkbox"/> | yes <input type="checkbox"/> |                                                                                                                           |          |          |          |          |          |
| Visual doorbell                                                                          | no <input type="checkbox"/> | yes <input type="checkbox"/> |                                                                                                                           |          |          |          |          |          |
| Door detector                                                                            | no <input type="checkbox"/> | yes <input type="checkbox"/> |                                                                                                                           |          |          |          |          |          |
| Automatic switch                                                                         | no <input type="checkbox"/> | yes <input type="checkbox"/> |                                                                                                                           |          |          |          |          |          |
| Inactivity detector                                                                      | no <input type="checkbox"/> | yes <input type="checkbox"/> |                                                                                                                           |          |          |          |          |          |
| Fall detection bath + toilet                                                             | no <input type="checkbox"/> | yes <input type="checkbox"/> |                                                                                                                           |          |          |          |          |          |
| All-off control                                                                          | no <input type="checkbox"/> | yes <input type="checkbox"/> |                                                                                                                           |          |          |          |          |          |
| Home emergency call                                                                      | no <input type="checkbox"/> | yes <input type="checkbox"/> |                                                                                                                           |          |          |          |          |          |
| Heating control                                                                          | no <input type="checkbox"/> | yes <input type="checkbox"/> |                                                                                                                           |          |          |          |          |          |
| <b>INSTALLED CONVENTIONAL MOBILITY SUPPORTING AIDS</b>                                   |                             |                              |                                                                                                                           |          |          |          |          |          |
| Service socket                                                                           | no <input type="checkbox"/> | yes <input type="checkbox"/> |                                                                                                                           |          |          |          |          |          |
| Object socket                                                                            | no <input type="checkbox"/> | yes <input type="checkbox"/> |                                                                                                                           |          |          |          |          |          |
| Handles bathroom                                                                         | no <input type="checkbox"/> | yes <input type="checkbox"/> |                                                                                                                           |          |          |          |          |          |
| Handles toilet                                                                           | no <input type="checkbox"/> | yes <input type="checkbox"/> |                                                                                                                           |          |          |          |          |          |
| Handles balcony                                                                          | no <input type="checkbox"/> | yes <input type="checkbox"/> |                                                                                                                           |          |          |          |          |          |
| Handles corridor                                                                         | no <input type="checkbox"/> | yes <input type="checkbox"/> |                                                                                                                           |          |          |          |          |          |
| Balcony exit                                                                             | no <input type="checkbox"/> | yes <input type="checkbox"/> |                                                                                                                           |          |          |          |          |          |
| Balcony elevation                                                                        | no <input type="checkbox"/> | yes <input type="checkbox"/> |                                                                                                                           |          |          |          |          |          |

How satisfied are you overall with the aids and smart home solutions installed in your home?

**1      2      3      4      5      6**

**Thank you for your participation!**
